# Supplementary material
Source: publisher figshare collection journal article supplement (https://rs.figshare.com/ndownloader/files/18044618)
Supplement: Supplementary file 1 [file 18044618]

## Sheet: ReadMe
	Figure & Table Brief
Figure S1.	(A) Nests of the study species P. satan; (B) P. satan hunt larvae of D. saccharalis (SB) and S. frugiperda (FAW); (C) large screenhouse; (D) set up for behavioural observations of P. satan.
Table S1.	Random effect variance in models 1-7. Dropped factor indicates an effect removed from the model due to having minimal variance.
Table S2.	Results for temperature-fixed-effects in models 1-3.
Table S3.	Results for model 4. Experiment 1, comparing total visitations rates between control, concealed, and unconcealed treatments.

## Sheet: Figure S1
	Supplementary Figure 1. (A) Nests of the study species P. satan are clusters (i.e. satellites) of brood-containing combs, with adults which can be easily translocated into nest boxes; (B) P. satan readily hunt larvae of D. saccharalis (SB) and S. frugiperda (FAW) in the semi-natural environment of a (C) large screenhouse; (D) set up for behavioural observations of P. satan foraging on pests of su…

## Sheet: Table S1
	Supplementary Table 1. Random effect variance and standard deviation in models (2 d.p.), factor was dropped if variance equalled zero and the model re-ran without effect (** sig. p < 0.05; *** sig. p < 0.001).
	Experiment	Model	Model Type	Response Variable	Pest Species	Fixed Effect (treatment)			Random Effect Variance					Random Effect Standard Deviation
						χ2 / Z	p	n	Date	Session Time	Position in Screenhouse (by Session)	Number of Leaves	Plant ID	Date	Session Time	Position in Screenhouse (by Session)	Number of Leaves	Plant ID
	1	1	GZLMM-binomial	Pest predated upon within 45 min period (yes/no).	D. saccharalis	20.76	< 0.001***	64	dropped factor	< 0.01	0.11	n/a	n/a	dropped factor	< 0.01	0.33	n/a	n/a
					S. frugiperda	24.03	< 0.001***	64	< 0.01	2.33	0.71	< 0.01	n/a	< 0.01	1.53	0.84	< 0.01	n/a
	1	2	GLMM	Time taken to predate (seconds).	D. saccharalis	1.29	0.257	43	dropped factor	0.01	dropped factor	n/a	n/a	dropped factor	0.11	dropped factor	n/a	n/a
					S. frugiperda	1.23	0.267	51	dropped factor	0.02	0.04	0.03	n/a	dropped factor	0.13	0.21	0.17	n/a
	1	3	GZLMM-nbinomial	Visits to plant prior to predation (count).	D. saccharalis	-1.8	0.071	43	< 0.01	< 0.01	< 0.01	n/a	n/a	< 0.01	< 0.01	< 0.01	n/a	n/a
					S. frugiperda	-1.32	0.186	51	< 0.01	< 0.01	< 0.01	< 0.01	n/a	< 0.01	< 0.01	< 0.01	< 0.01	n/a
	1	4	GZLMM-nbinomial	Total number of visits to plant (count).	D. saccharalis	-	-	96	0.45	0.12	0.73	n/a	n/a	0.67	0.34	0.86	n/a	n/a
					S. frugiperda	-	-	96	0.04	0.02	< 0.01	< 0.01	n/a	0.2	0.15	< 0.01	< 0.01	n/a
	2	5	GZLM-nbinomial	Number of larvae per plant (count).	S. frugiperda	3.09	0.002**	30	n/a	n/a	n/a	n/a	n/a	n/a	n/a	n/a	n/a	n/a
	2	6	GLMM	Wet weight of larvae (mg).	S. frugiperda	26.37	< 0.001***	49	n/a	n/a	n/a	n/a	< 0.01	n/a	n/a	n/a	n/a	0.01
	2	7	GLMM	Length of larvae (mm).	S. frugiperda	28.1	< 0.001***	49	n/a	n/a	n/a	n/a	0.06	n/a	n/a	n/a	n/a	0.21

## Sheet: Table S2
	Supplementary Table 2. Temperature effect in models 1-3 (oC) (** sig. p < 0.05; *** sig. p < 0.001).
	Experiment	Model	Model Type	Response variable	Pest Species	Fixed Effect (treatment)			Fixed Effect (temperature)
						χ2 / Z	p	n	χ2 / Z	Temperature Range (oC)	p
	1	1	GZLMM-binomial	Pest predated upon within 45 min period (yes/no).	D. saccharalis	20.76	< 0.001***	64	11.1	21.1–29.9	< 0.001***
					S. frugiperda	24.03	< 0.001***	64	0.29	23.1–39.4	0.59
	1	2	GLMM	Time taken to predate (seconds).	D. saccharalis	1.29	0.257	43	4.84	21.2–29.9	0.028**
					S. frugiperda	1.23	0.267	51	1.13	23.1–39.4	0.288
	1	3	GZLMM-nbinomial	Visits to plant prior to predation (count).	D. saccharalis	-1.8	0.071	43	-0.26	21.2–29.9	0.796
					S. frugiperda	-1.32	0.186	51	-0.18	23.1–39.4	0.859

## Sheet: Table S3
	Supplementary Table 3. Test of total visitation rates within 45 min between unconcealed, concealed, and control treatments in Experiment 1 (negative binomial generalized linear mixed models, with random effects - date of observation, position in the screenhouse nested within session time, and number of leaves (maize); ** sig. p < 0.05; *** sig. p < 0.001).
	Pest Species	Fixed Effect (treatment)				Effect Direction					Conclusion
		Treatment Comparison		Z	p	Median Number of Visitations		Interquartile Range		Direction
	D. saccharalis	Control	Unconcealed	0.7	0.486	Control = 5.50	Unconcealed = 7.50	Control = 8.25	Unconcealed = 5.25	No significant difference between Control and Unconcealed treatments.	Wasps may have been attracted to the presence or post-scene of a wasp acting to pull a pest larva from the plant.
			Concealed	2.25	0.024**		Concealed = 8.00		Concealed = 5.25	Significantly more visitations within 45 min in Concealed treatments compared to Control.
	S. frugiperda	Control	Unconcealed	3.73	< 0.001 ***	Control = 4.00	Unconcealed = 8.00	Control = 4.25	Unconcealed = 3.50	Significantly more visitations within 45 min in Unconcealed treatments compared to Control.	As well as the above, fall armyworm larvae often left large amounts of haemolymph behind on the leaf after wasps attacked them; this may have attracted additional foragers post-pest capture (both treatments).
			Concealed	5.62	< 0.001***		Concealed = 10.50		Concealed = 8.00	Significantly more visitations within 45 min in Concealed treatments compared to Control.
